# Supplementary material for: Regulating the emission of tetraphenylethenes by changing the alkoxyl linkage length between two neighboring phenyl moieties
Source: Royal Society of Chemistry journal article supplement (doi:10.1039/c8cc01184b), 2018-01-01
Supplement: c8cc01184b1.pdf [file c8cc01184b1.pdf]

## Supporting Information

# **Regulating the Emission of Tetraphenylethenes *through* Changing the Alkoxy Linkage Length between Two Neighboring Phenyl Moieties**

Dandan Lou,<sup>a</sup> Xiangcheng Lu,<sup>a</sup> Mengxing Zhang,<sup>a</sup> Ming Bai,<sup>\*a</sup> and Jianzhuang Jiang<sup>b</sup>

<sup>a</sup>Marine College, Shandong University (Weihai), Weihai, 264209, China, E-mail: ming\_bai@sdu.edu.cn

<sup>b</sup>Beijing Key Laboratory for Science and Application of Functional Molecular and Crystalline Materials, Department of Chemistry, University of Science and Technology Beijing, Beijing, 100083, China

## Table of Contents

### Experimental Procedures

**Fig. S1.**  $^1\text{H}$  NMR spectrum of 2,2'-dimethyloxy-benzophenone in  $\text{CDCl}_3$ .

**Fig. S2.**  $^{13}\text{C}$  NMR spectrum of 2,2'-dimethyloxy-benzophenone in  $\text{CDCl}_3$ .

**Fig. S3.** ESI-MS spectrum of 2,2'-dimethyloxy-benzophenone.

**Fig. S4.**  $^1\text{H}$  NMR spectrum of **TPEOMe** in  $\text{CDCl}_3$ .

**Fig. S5.**  $^{13}\text{C}$  NMR spectrum of **TPEOMe** in  $\text{CDCl}_3$ .

**Fig. S6.** ESI-MS spectrum of **TPEOMe**.

**Fig. S7.**  $^1\text{H}$  NMR spectrum of **TPEC1** in  $\text{CDCl}_3$ .

**Fig. S8.**  $^{13}\text{C}$  NMR spectrum of **TPEC1** in  $\text{CDCl}_3$ .

**Fig. S9.** ESI-MS spectrum of **TPEC1**.

**Fig. S10.**  $^1\text{H}$  NMR spectrum of **TPEC2** in  $\text{CDCl}_3$ .

**Fig. S11.**  $^{13}\text{C}$  NMR spectrum of **TPEC2** in  $\text{CDCl}_3$ .

**Fig. S12.** ESI-MS spectrum of **TPEC2**.

**Fig. S13.**  $^1\text{H}$  NMR spectrum of **TPEC3** in  $\text{CDCl}_3$ .

**Fig. S14.**  $^{13}\text{C}$  NMR spectrum of **TPEC3** in  $\text{CDCl}_3$ .

**Fig. S15.** 2D COSY spectrum of **TPEC3** in  $\text{CDCl}_3$ .

**Fig. S16.** ESI-MS spectrum of **TPEC3**.

**Fig. S17.**  $^1\text{H}$  NMR spectrum of **TPEC4** in  $\text{CDCl}_3$ .

**Fig. S18.**  $^{13}\text{C}$  NMR spectrum of **TPEC4** in  $\text{CDCl}_3$ .

**Fig. S19.** 2D COSY spectrum of **TPEC4** in  $\text{CDCl}_3$ .

**Fig. S20.** ESI-MS spectrum of **TPEC4**.

**Fig. S21.** The rule for nomination of the two conformational enantiomers of all compounds.

**Fig. S22.** The definition of the dihedral angles formed between the phenyl rings and the C=C bond.

**Fig. S23.** Fluorescence spectra of **TPEC1** in different concentrations.

**Fig. S24.** Fluorescence spectra of triphenylethene in DMSO-water mixtures with different water fractions and in different concentrations.

**Fig. S25.** The time-resolved emission decay curves of **TPEC3** in crystal state and after grinding.

**Fig. S26.** (A) Fluorescence spectra and (B) time-resolved emission decay curves of **TPEC2**, **TPEC3**, **TPEC4**, and **TPEOMe** in crystal state.

**Fig. S27.** Fluorescence spectra and plots of the fluorescence intensity at maximum emission of **TPEC2**, **TPEC3**, **TPEC4**, and **TPEOMe** in DMSO-water mixtures with different water fractions.

**Fig. S28.** (A) Uv-vis spectra of **TPEC2**, **TPEC3**, **TPEC4**, and **TPEOMe** in DMSO-water mixtures with different water fractions.

**Fig. S29.** Normalized fluorescence spectra of **TPEC2**, **TPEC3**, **TPEC4**, and **TPEOMe** in DMSO-water mixtures with  $f_w = 90\%$ .

**Table S1.** Crystallographic data of **TPEOMe**, **TPEC1**, **TPEC2**, **TPEC3**, and **TPEC4**.

**Table S2.** The dihedral angles between the phenyl moieties and the C=C bond of **TPEC1**, **TPEC2**, **TPEC3**, **TPEC4**, and **TPEOMe** with *P* conformation.

**Table S3.** The maximum emission wavelength, fluorescence quantum efficiency and fluorescence lifetime data of **TPEC1**, **TPEC2**, **TPEC3**, **TPEC4**, and **TPEOMe** in DMSO, DMSO-water mixtures with  $f_w = 90\%$ , crystal state and **TPEC3** after grinding.

## Experimental Section

*General Remarks.* Tetrahydrofuran (THF) was distilled from sodium wire and benzophenone under nitrogen. Dichloromethane (DCM) was distilled from CaH<sub>2</sub>. Column chromatography was carried out on a silica gel column (Qingdao Haiyang, 200-300 mesh) with the indicated eluents. All the other reagents such as benzophenone, *n*-butyllithium in hexane (2.5 mol/L), 2,2'-dihydroxybenzophenone, diphenylmethane, methyl iodine, diiodomethane, 1,2-dibromoethane, 1,3-dibromopropane, 1,4-dibromobutane, and triphenylethene were used as received.

<sup>1</sup>H NMR spectra were recorded on a Bruker DPX 400 spectrometer (1H: 400 MHz, 13C: 100 MHz) in CDCl<sub>3</sub>. Spectra were referenced internally using the residual solvent resonances ( $\delta$  = 7.28 for 1H NMR) relative to SiMe<sub>4</sub> ( $\delta$  = 0 ppm). <sup>13</sup>C NMR spectra were referenced internally by using the solvent resonances ( $\delta$  = 77.00 ppm for CDCl<sub>3</sub>). Electronic absorption spectra were recorded on a Hitachi U-2900 spectrophotometer. Steady-state fluorescence spectra were recorded on a Hitachi F-7000 spectrophotometer and an Edinburgh Instruments FLS920 three-monochromator spectrophotometer. The emission spectra were corrected for the wavelength dependence of the sensitivity of the detection system. The absolute fluorescence quantum yields were measured with an integrating sphere. Fluorescence images were taken on a Nikon Eclipse Ti fluorescence microscope. ESI-MS spectrum was taken on a Thermo Fisher Q-Exactive mass spectrometer. Single-crystal X-ray diffraction analyses were performed on an Agilent SuperNova Atlas Dual diffractometer using CuK $\alpha$  radiation ( $\lambda$  = 1.54184 Å). Structure was solved by direct methods using SHELXTL and refined by full-matrix least-squares on F<sup>2</sup> using SHELX-97. Non-hydrogen atoms were refined with anisotropic displacement parameters during the final cycles. Hydrogen atoms were placed in calculated positions with isotropic displacement parameters set to 1.2 $\times$ U<sub>eq</sub> of the attached atom. Crystallographic data (excluding structure factors) for the structures reported in this paper have been deposited in the Cambridge Crystallographic Data Center with CCDC Number: **TPEOMe** 1820140, **TPEC1** 1820141, **TPEC2** 1820142, **TPEC3** 1820143, and **TPEC4** 1820144..

*Synthesis of 2,2'-Dimethyloxy-benzophenone.* 2,2'-Dihydroxy-benzophenone (0.64 g, 3 mmol), K<sub>2</sub>CO<sub>3</sub> (4.1 g, 30 mmol) and methyl iodine (1.7 g, 12 mmol) were dissolved in dry acetone (50 mL). The mixture was heated to reflux for 12 h under nitrogen. The resulting solution was filtered through a pad of Celite and evaporated to afford the crude product. The crude product was purified by silica gel column chromatography using hexane as eluent to give white solid in 90% yield (0.65 g). <sup>1</sup>H NMR (400 MHz, CDCl<sub>3</sub>), (TMS, ppm): 7.53 (d, 2H, *J* = 7.6 Hz, ArH), 7.45 (t, 2H, *J* = 7.6 Hz, ArH), 7.01 (t, 2H, *J* = 7.2 Hz, ArH), 6.93 (t, 2H, *J* = 8.4 Hz, ArH), 3.68 (s, 6H, -OCH<sub>3</sub>). <sup>13</sup>C NMR (100 MHz, CDCl<sub>3</sub>),  $\delta$ : 195.28, 158.28, 132.53, 130.38, 130.26, 120.32, 111.44, 55.68. ESI-MS: Found an isotopic cluster peaking at *m/z* [M+Na<sup>+</sup>] 265.14; Calculated for C<sub>15</sub>H<sub>14</sub>O<sub>3</sub>Na, 265.08.

*Synthesis of TPEOMe.* To a solution of diphenylmethane (0.55 g, 3 mmol) in dry THF (30 mL), 1.0 mL of 2.5 M solution of *n*-butyllithium in hexane (2.5 mmol) was added at 0°C under nitrogen. The resulting orange-red solution was stirred for 45 min at this temperature. 2,2'-Dimethyloxy-benzophenone (0.54 g, 2.25 mmol) was then added and the reaction mixture warmed to room temperature and then stirred at 70°C for another 24 h. The reaction was quenched by adding 10% aqueous ammonium chloride solution. The organic layer was extracted with dichloromethane (3 $\times$ 50 mL), and the combined organic layers were washed with a saturated brine solution and dried over with anhydrous MgSO<sub>4</sub>. The solvent was evaporated, and the resulting crude alcohol was dissolved in 80 mL of toluene in a 150 mL round-bottom flask fitted with a Dean-Stark trap. *p*-

Toluenesulphonic acid (52 mg, 0.3 mmol) was added, and the mixture was refluxed for 4 h and cooled to room temperature. The toluene layer was washed with 10% aqueous NH<sub>4</sub>Cl solution and dried over with anhydrous MgSO<sub>4</sub>. After evaporating the solvent, the crude product was purified by silica gel column chromatography using hexane/dichloromethane (DCM) (95/5, v/v) as eluent to give white solid in 40% yield (0.35 g). <sup>1</sup>H NMR (400 MHz, CDCl<sub>3</sub>), (TMS, ppm): 7.11-7.06 (m, 14H, ArH), 6.74 (t, 2H, *J* = 7.6 Hz, ArH), 6.69 (d, 2H, *J* = 8.0 Hz, ArH), 3.44 (s, 6H, -OMe). <sup>13</sup>C NMR (100 MHz, CDCl<sub>3</sub>),  $\delta$ : 151.17, 143.60, 142.61, 133.29, 132.76, 132.03, 130.47, 127.70, 127.05, 126.13, 119.97, 111.21, 55.34. ESI-MS: Found an isotopic cluster peaking at *m/z* [M+Na<sup>+</sup>] 415.15; Calculated for C<sub>28</sub>H<sub>24</sub>O<sub>2</sub>Na, 415.17.

**Synthesis of  $\alpha,\alpha'$ -dihydroxy TPE.** The solution of **TPEOMe** (392 mg, 1 mmol) in dry DCM (20 mL) was cooled to -65 °C under a nitrogen atmosphere. A 1.0 M solution of BBr<sub>3</sub> (4.0 mL, 4.0 mmol) was added via syringe. The resulting mixture was kept at -65 °C for 20 minutes and then allowed to warm to room temperature for 12 h. The reaction mixture was poured into water (100 mL) and stirred for another 1 h under nitrogen. Then the reaction mixture was extracted with DCM and dried over with anhydrous MgSO<sub>4</sub>. For compound  $\alpha,\alpha'$ -dihydroxy TPE is readily to be oxide in the air, the obtained product was not purified further (338 mg, 93%).

**Synthesis of TPEC1.** The  $\alpha,\alpha'$ -dihydroxy TPE (364 mg, 1 mmol), K<sub>2</sub>CO<sub>3</sub> (1.38 g, 10 mmol) and diiodomethane (402 mg, 1.5 mmol) were dissolved in dry acetone (50 mL). The mixture was heated to reflux for 12 h under nitrogen. The resulting solution was filtered and evaporated to afford the crude product. The crude product was purified by silica gel column chromatography using hexane/DCM (80/20, v/v) as eluent to give white solid in 60% yield (226 mg). <sup>1</sup>H NMR (400 MHz, CDCl<sub>3</sub>), (TMS, ppm): 7.25 (d, 4H, *J* = 7.2 Hz, ArH), 7.17 (t, 4H, *J* = 6.8 Hz, ArH), 7.10 (t, 4H, *J* = 7.2 Hz, ArH), 7.06 (t, 2H, *J* = 7.6 Hz, ArH), 6.94 (d, 2H, *J* = 8.0 Hz, ArH), 6.85 (t, 2H, *J* = 7.2 Hz, ArH), 6.15 (s, 2H, -OCH<sub>2</sub>-). <sup>13</sup>C NMR (100 MHz, CDCl<sub>3</sub>)  $\delta$ : 154.29, 142.76, 141.08, 135.27, 131.31, 130.66, 129.05, 128.15, 127.79, 126.63, 123.02, 120.35, 94.26. ESI-MS: Found an isotopic cluster peaking at *m/z* [M+CH<sub>3</sub>OH+Na<sup>+</sup>] 431.09; Calculated for C<sub>68</sub>H<sub>78</sub>O<sub>10</sub>Na, 431.16.

**Synthesis of TPEC2.** The same synthetic procedure described in **TPEC1** was performed for compound **TPEC2**, and the crude product was purified by silica gel column chromatography using hexane/DCM (85/15, v/v) as eluent to give white solid in 30% yield (117 mg). <sup>1</sup>H NMR (400 MHz, CDCl<sub>3</sub>), (TMS, ppm): 7.13-7.09 (m, 14H, ArH), 6.92 (t, 2H, *J* = 7.2 Hz, ArH), 6.89 (d, 2H, *J* = 8.8 Hz, ArH), 4.36 (s, 4H, -OCH<sub>2</sub>-). <sup>13</sup>C NMR (100 MHz, CDCl<sub>3</sub>),  $\delta$ : 157.23, 142.72, 142.22, 136.26, 132.75, 131.08, 130.29, 128.35, 127.42, 126.47, 123.61, 121.92, 74.58. ESI-MS: Found an isotopic cluster peaking at *m/z* [M+Na<sup>+</sup>] 413.16; Calculated for C<sub>28</sub>H<sub>22</sub>O<sub>2</sub>Na, 413.15.

**Synthesis of TPEC3.** The same synthetic procedure described in **TPEC1** was performed for **TPEC3**, and the crude product was purified by column chromatography on silica gel using hexane/DCM (80/20, v/v) as the eluent to obtain **TPEC3** (67%, yield) as a white powder. <sup>1</sup>H NMR (400 MHz, CDCl<sub>3</sub>), (TMS, ppm): 7.13-7.07 (m, 14 H, ArH), 6.87 (s, 2H, ArH), 6.85 (s, 2H, ArH), 4.39 (s, 4H, -OCH<sub>2</sub>-), 2.09-2.03 (m, 2H, -CH<sub>2</sub>-). <sup>13</sup>C NMR (100 MHz, CDCl<sub>3</sub>),  $\delta$ : 157.40, 142.71, 142.57, 135.40, 134.13, 131.05, 130.23, 127.91, 127.27, 126.17, 122.06, 119.08, 71.13, 29.66. ESI-MS: Found an isotopic cluster peaking at *m/z* [M+Na<sup>+</sup>] 427.17; Calculated for C<sub>29</sub>H<sub>24</sub>O<sub>2</sub>Na, 427.17.

**Synthesis of TPEC4.** The same synthetic procedure described in **TPEC1** was performed for **TPEC4**, and the crude product was purified by column chromatography on silica gel using hexane/DCM (80/20, v/v) as the eluent to obtain **TPEC4** (92%, yield) as a white powder. <sup>1</sup>H NMR (400 MHz, CDCl<sub>3</sub>),  $\delta$  (TMS, ppm): 7.08-7.04 (m, 14H, ArH), 6.79 (t, 2H, *J* = 7.2 Hz, ArH), 6.75 (d, 2H, *J* = 8.0 Hz, ArH), 4.33 (s, 2H, -OCH<sub>2</sub>-), 4.11 (s, 2H, -

OCH<sub>2</sub>-), 1.97 (s, 2H, -CH<sub>2</sub>-), 1.97 (s, 2H, -CH<sub>2</sub>-). <sup>13</sup>C NMR (100 MHz, CDCl<sub>3</sub>), δ : 156.03, 142.97, 142.17, 134.52, 134.03, 131.09, 130.48, 127.58, 127.10, 126.04, 120.71, 115.31, 69.96, 26.97. ESI-MS: Found an isotopic cluster peaking at m/z [M+H<sup>+</sup>] 419.17; Calculated for C<sub>30</sub>H<sub>26</sub>O<sub>2</sub>, 419.20.

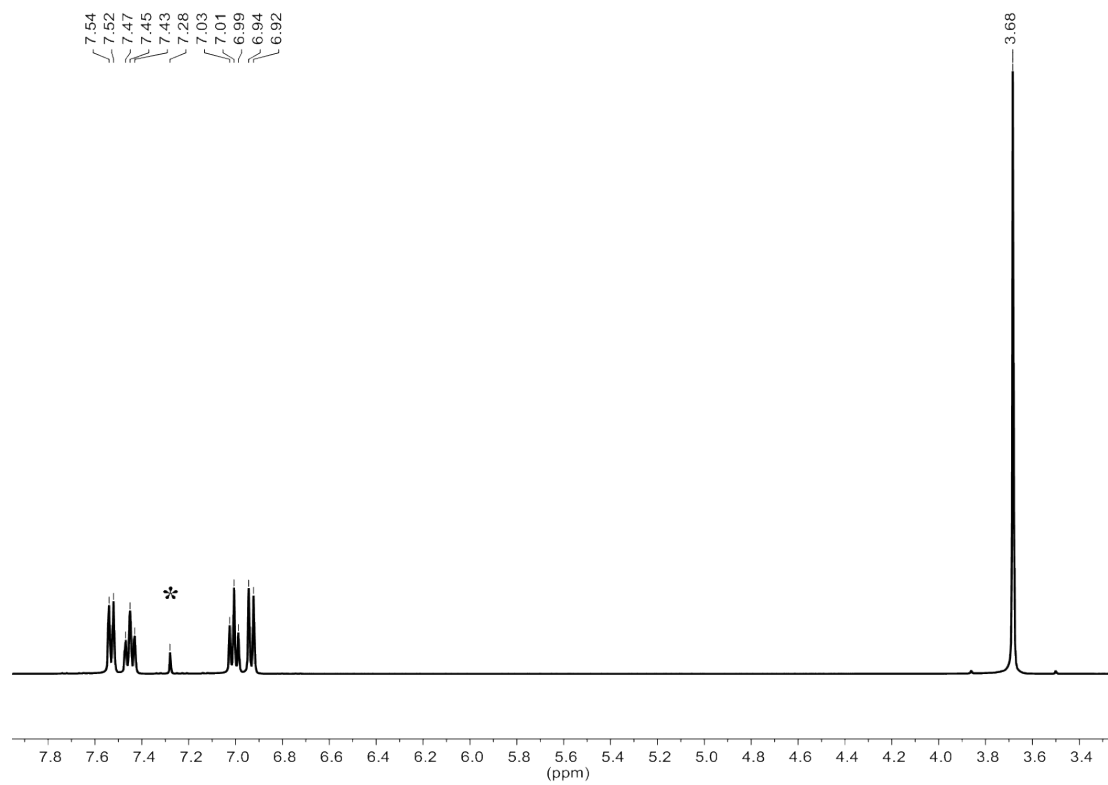

**Fig. S1.**  $^1\text{H}$  NMR spectrum of compound 2,2'-dimethoxy-benzophenone in  $\text{CDCl}_3$ . The residual solvent signals are marked with asterisks.

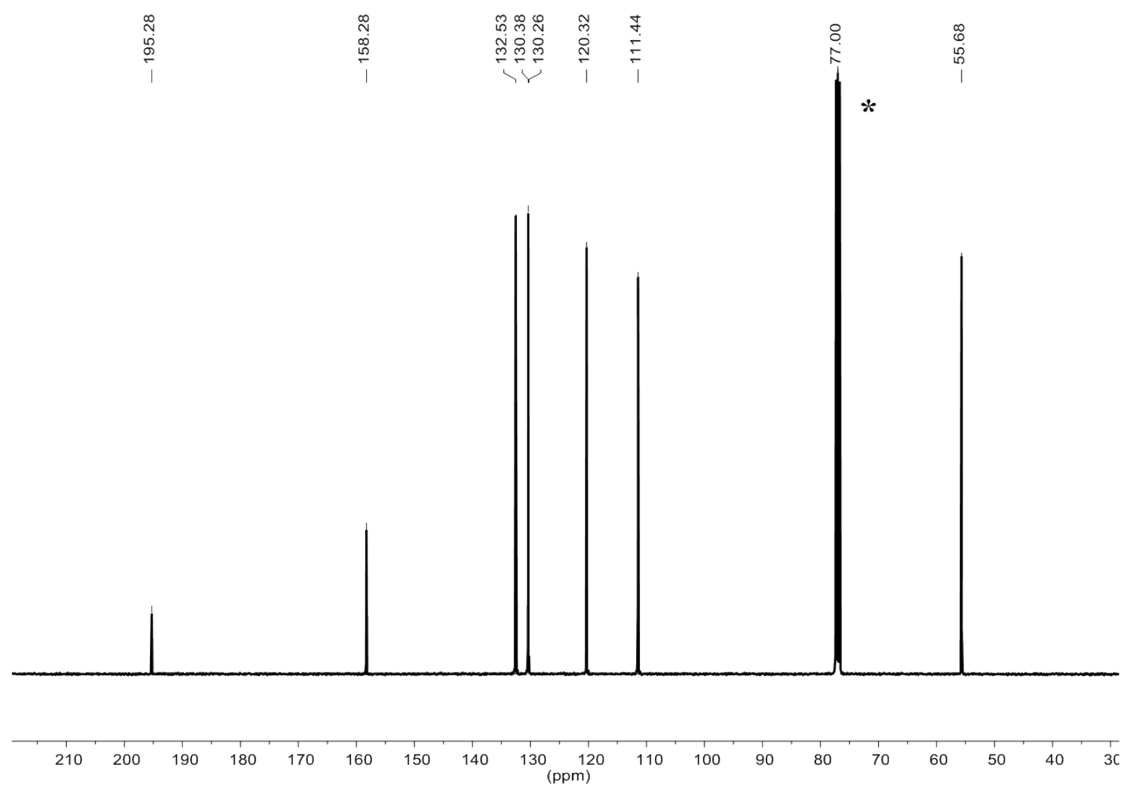

**Fig. S2.**  $^{13}\text{C}$  NMR spectrum of compound 2,2'-dimethoxy-benzophenone in  $\text{CDCl}_3$ . The residual solvent signals are marked with asterisks.



data05 #116 RT: 1.99 AV: 1 NL: 3.48E6  
T: {0,0} + c ESI Icorona sid=75.00 det=953.00 Full ms [100.00-1000.00]

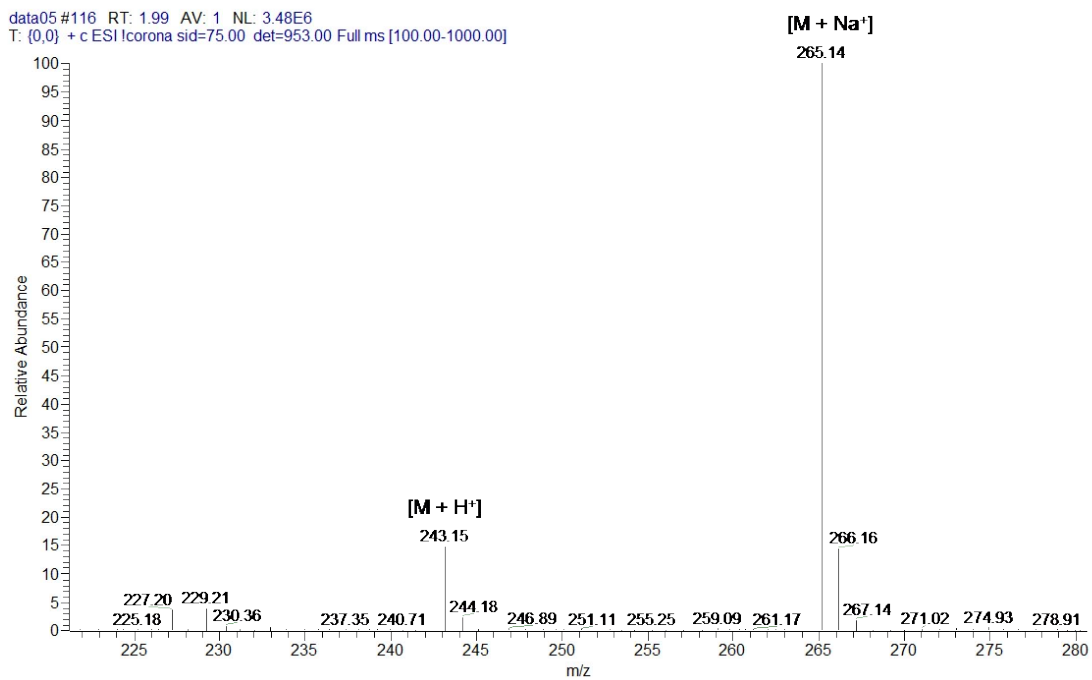

**Fig. S3.** ESI-MS spectrum of compound 2,2'-dimethoxy-benzophenone.

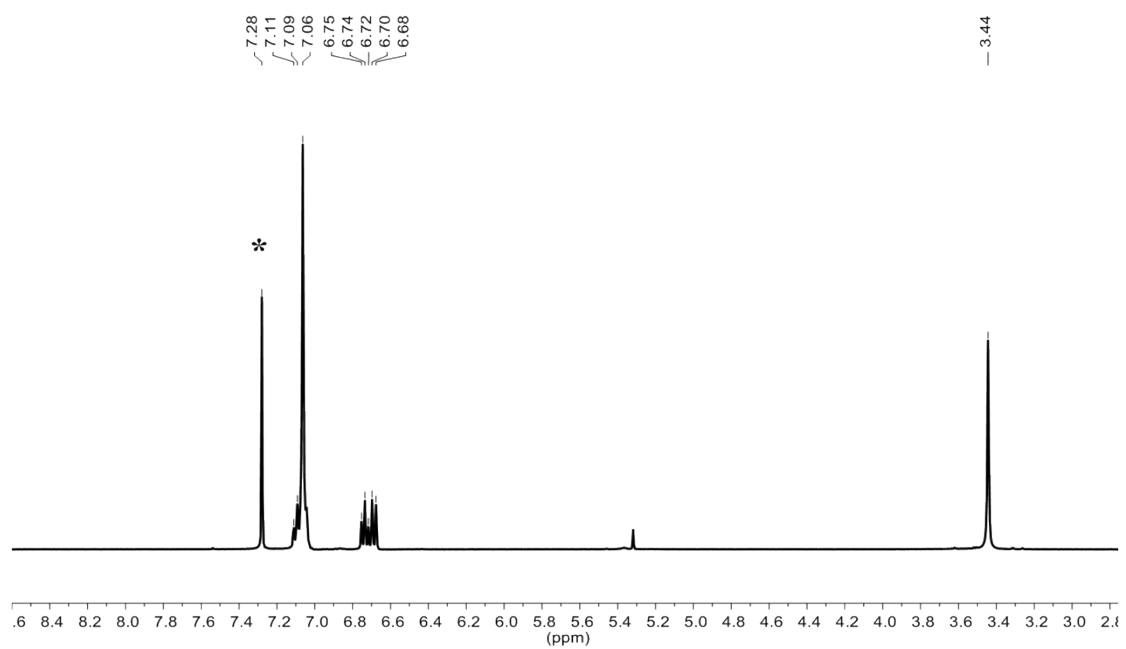

**Fig. S4.**  $^1\text{H}$  NMR spectrum of **TPEOMe** in  $\text{CDCl}_3$ . The residual solvent signals are marked with asterisks.

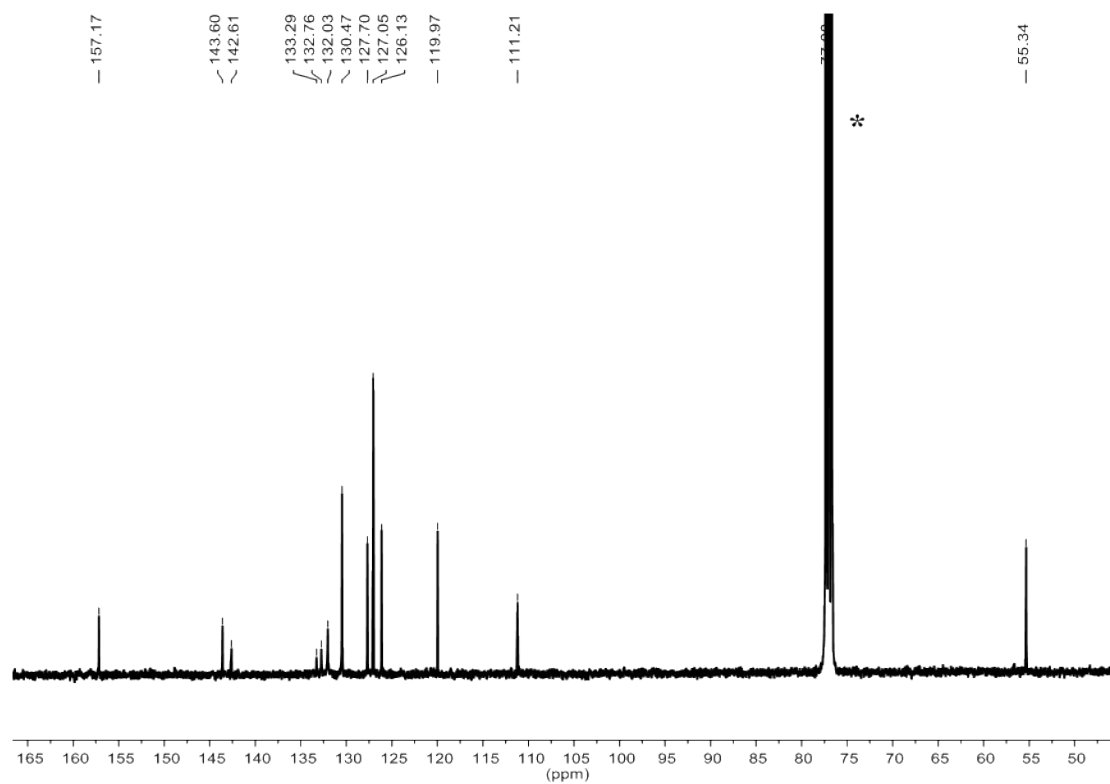

**Fig. S5.**  $^{13}\text{C}$  NMR spectrum of TPEOMe in  $\text{CDCl}_3$ . The residual solvent signals are marked with asterisks.

data06 #160 RT: 2.75 AV: 1 NL: 5.67E5  
T: {0,0} + c ESI!corona sid=75.00 det=953.00 Full ms [100.00-1000.00]

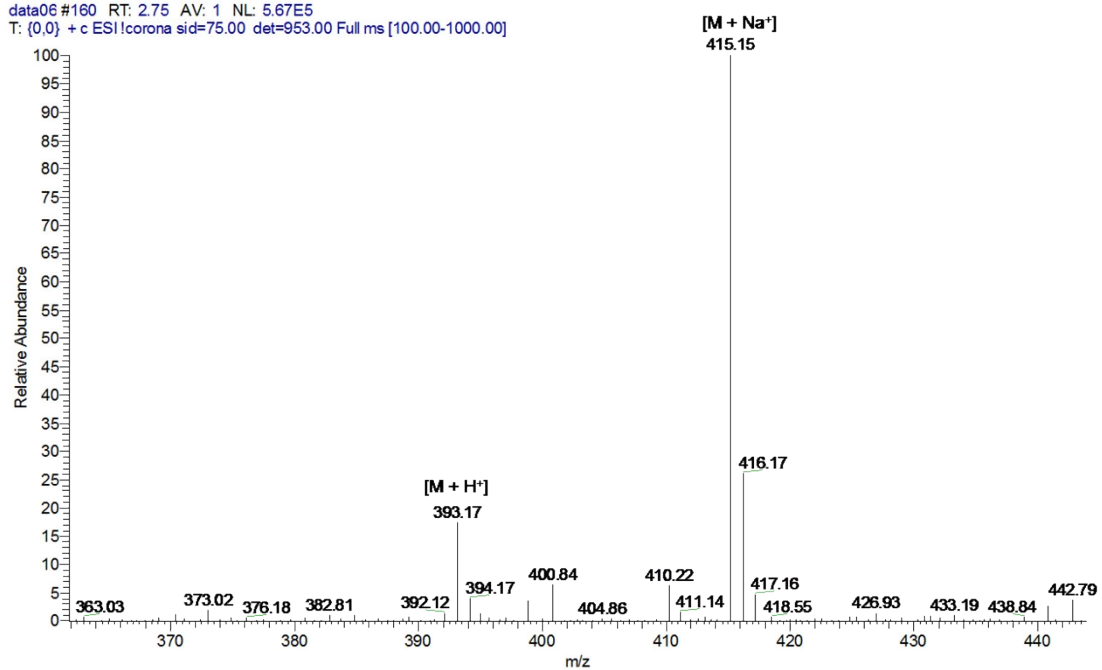

Fig. S6. ESI-MS spectrum of TPEOMe.

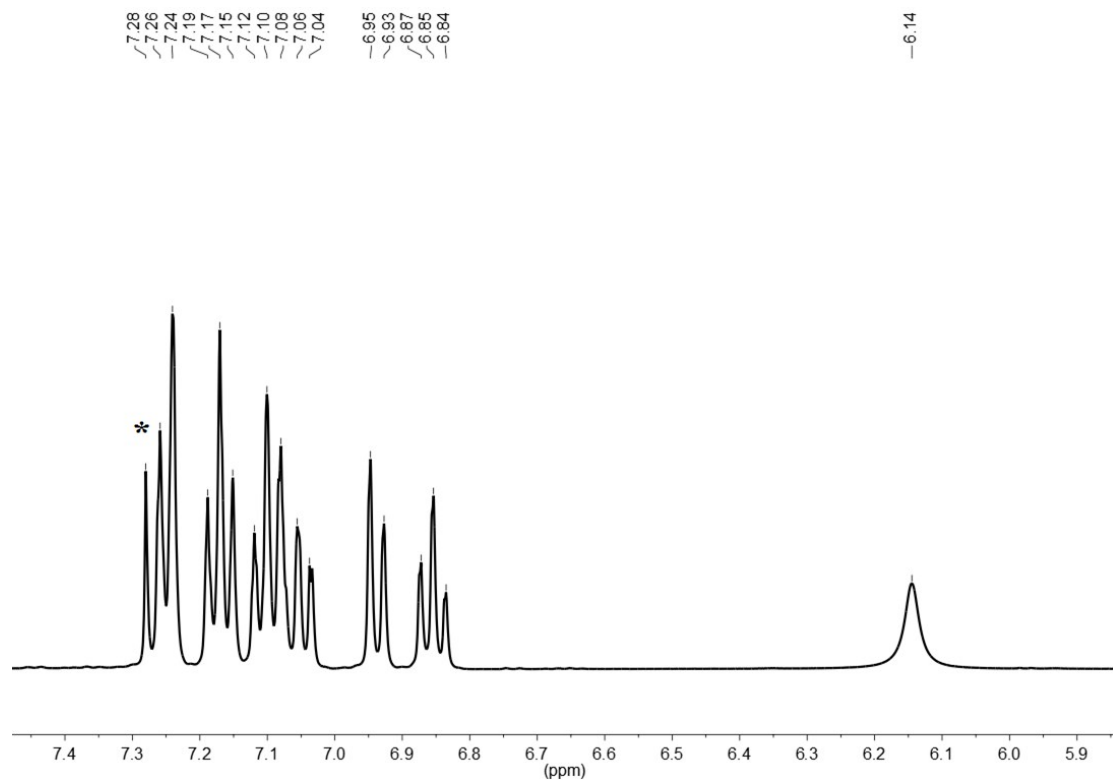

**Fig. S7.**  $^1\text{H}$  NMR spectrum of **TPEC1** in  $\text{CDCl}_3$ . The residual solvent signals are marked with asterisks.

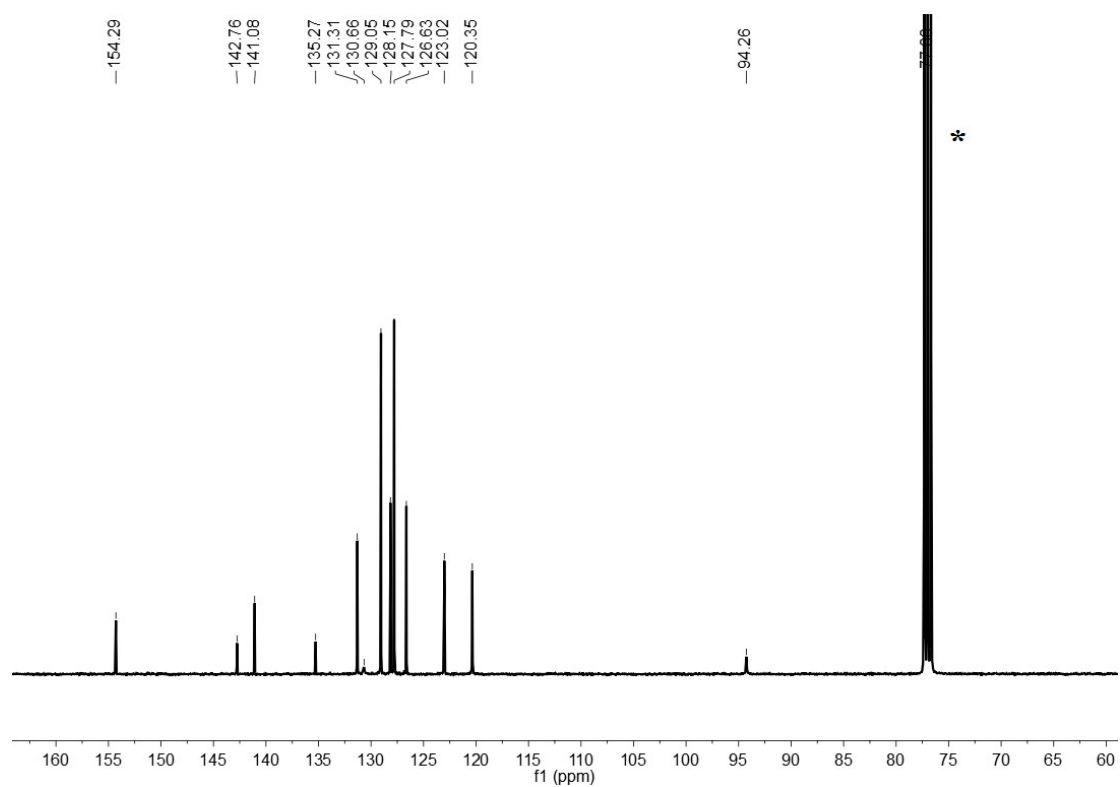

**Fig. S8.**  $^{13}\text{C}$  NMR spectrum of **TPEC1** in  $\text{CDCl}_3$ . The residual solvent signals are marked with asterisks.

1CTPE #141 RT: 2.42 AV: 1 NL: 5.28E4  
T: {0,0} + c ESI !corona sid=75.00 det=953.00 Full ms [100.00-1000.00]

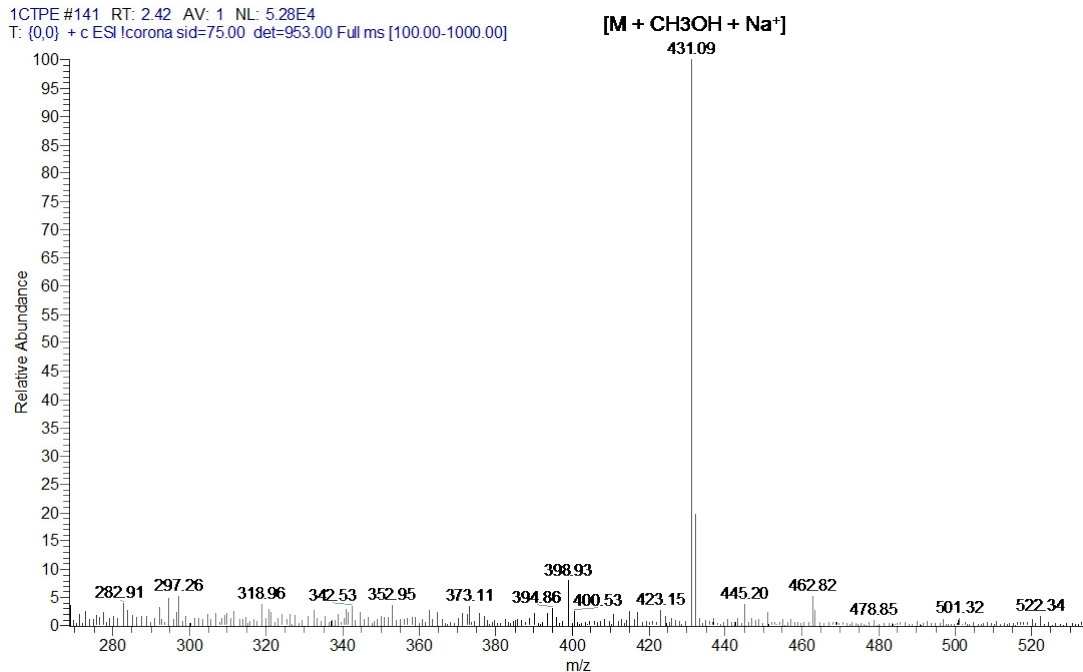

**Fig. S9.** ESI-MS spectrum of TPEC1.

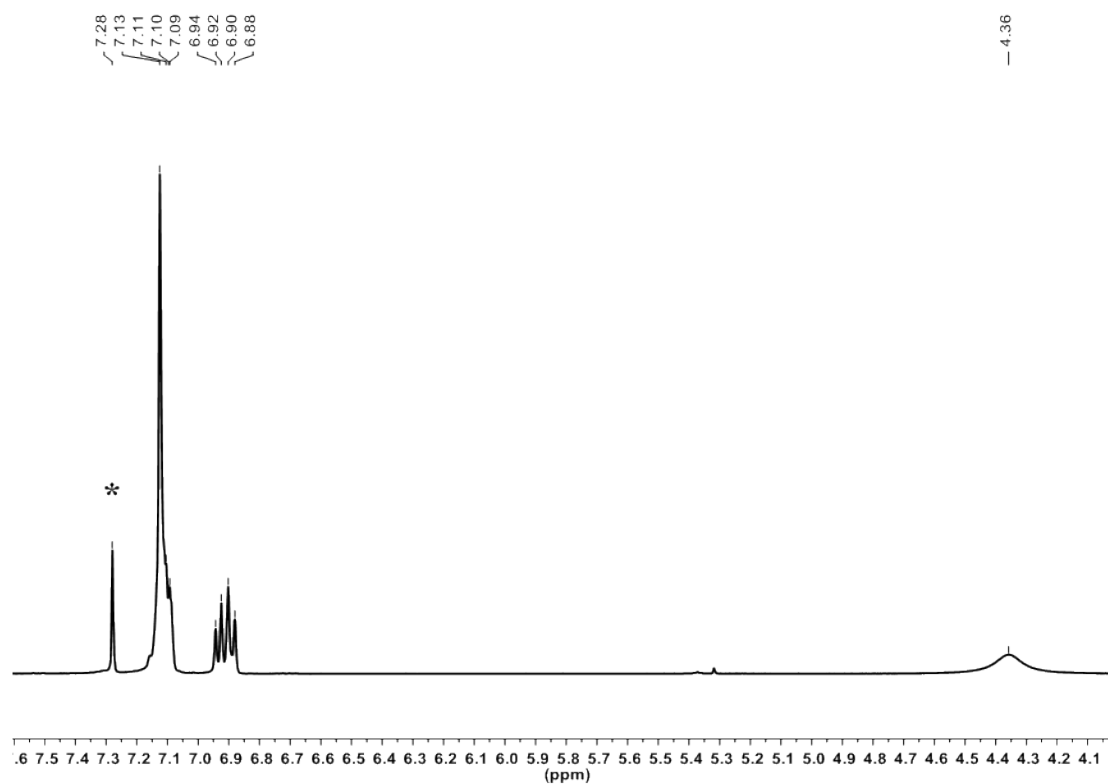

**Fig. S10.**  $^1\text{H}$  NMR spectrum of **TPEC2** in  $\text{CDCl}_3$ . The residual solvent signals are marked with asterisks.



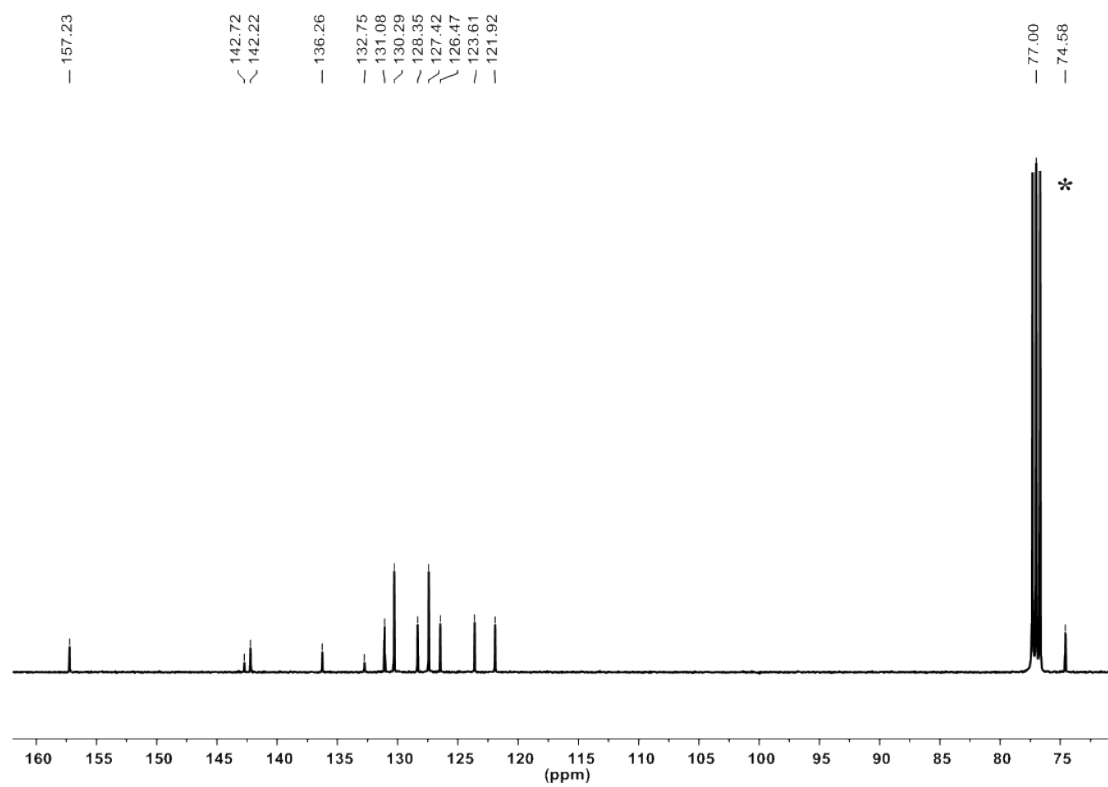

**Fig. S11.**  $^{13}\text{C}$  NMR spectrum of **TPEC2** in  $\text{CDCl}_3$ . The residual solvent signals are marked with asterisks.

data07 #144 RT: 2.47 AV: 1 NL: 3.70E5  
T: {0,0} + c ESI!corona sid=75.00 det=953.00 Full ms [100.00-1000.00]

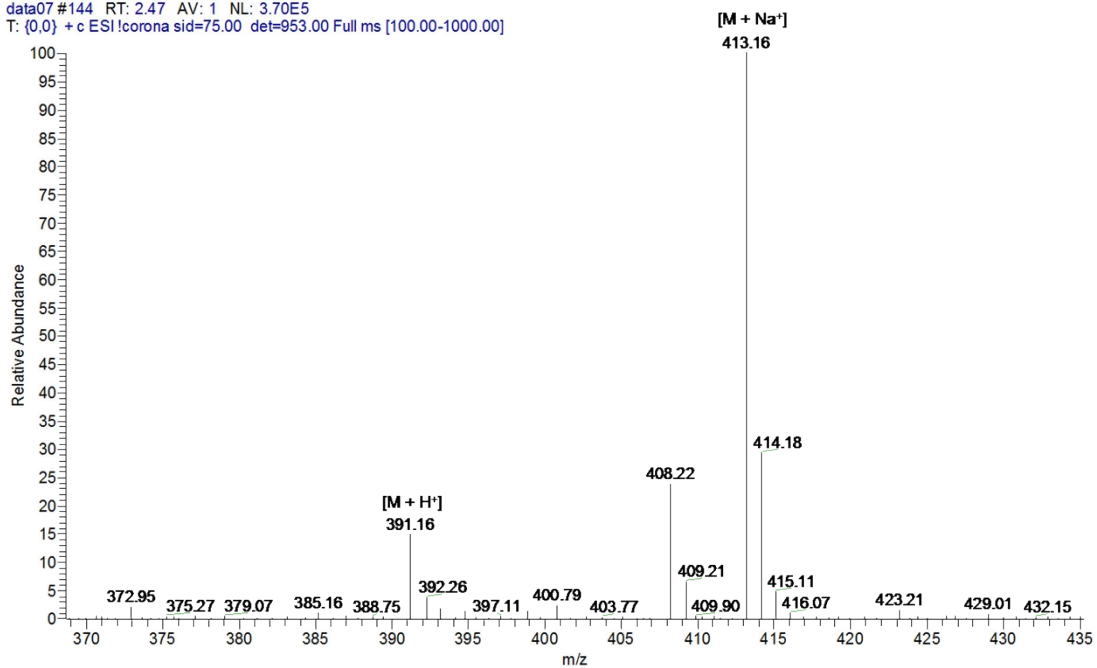

Fig. S12. ESI-MS spectrum of TPEC2.

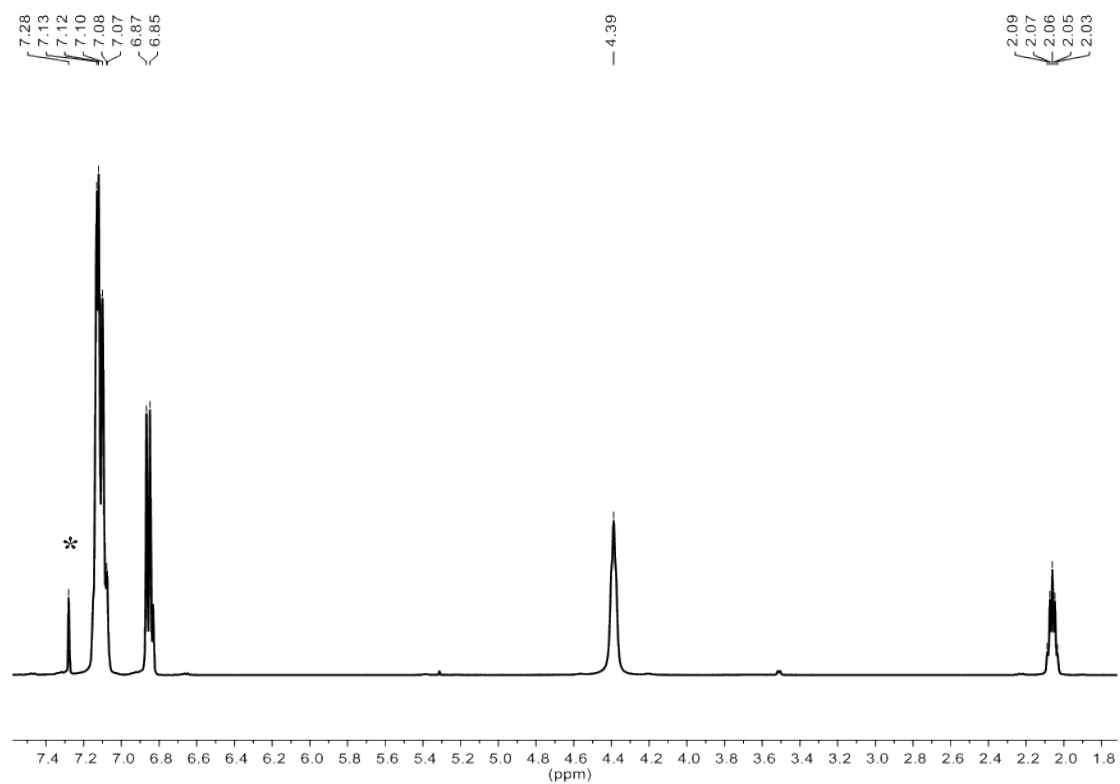

**Fig. S13.**  $^1\text{H}$  NMR spectrum of **TPEC3** in  $\text{CDCl}_3$ . The residual solvent signals are marked with asterisks.

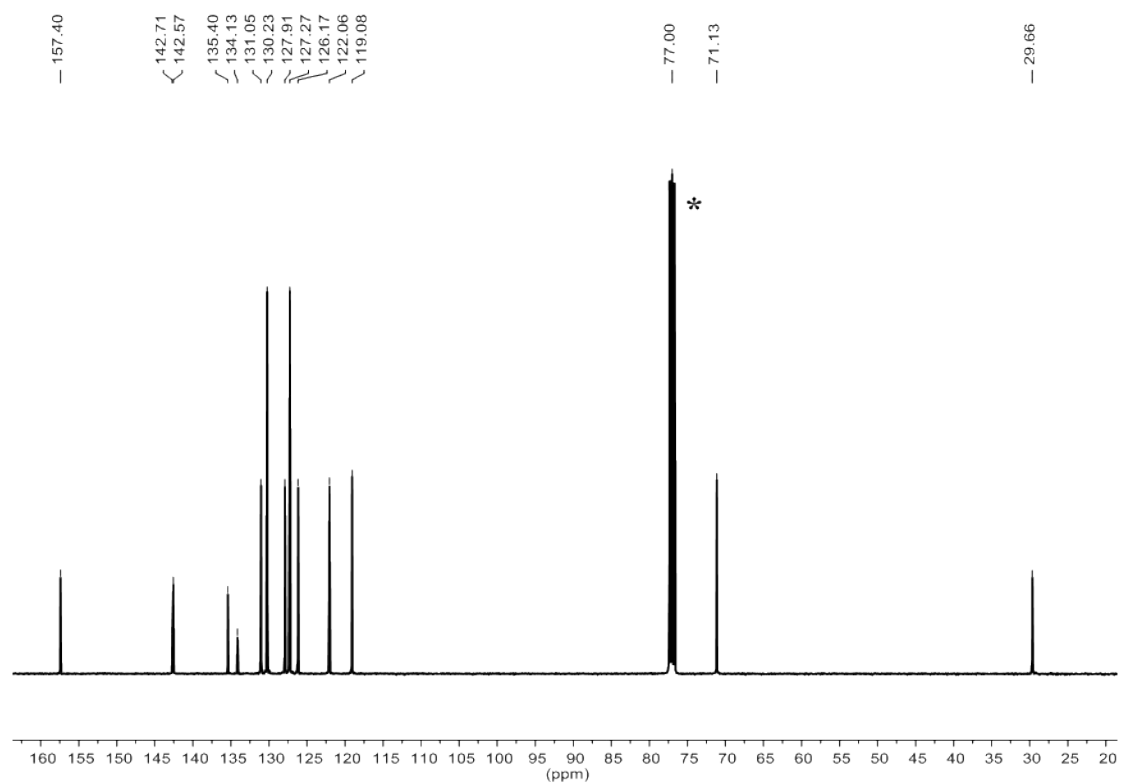

**Fig. S14.**  $^{13}\text{C}$  NMR spectrum of **TPEC3** in  $\text{CDCl}_3$ . The residual solvent signals are marked with asterisks.

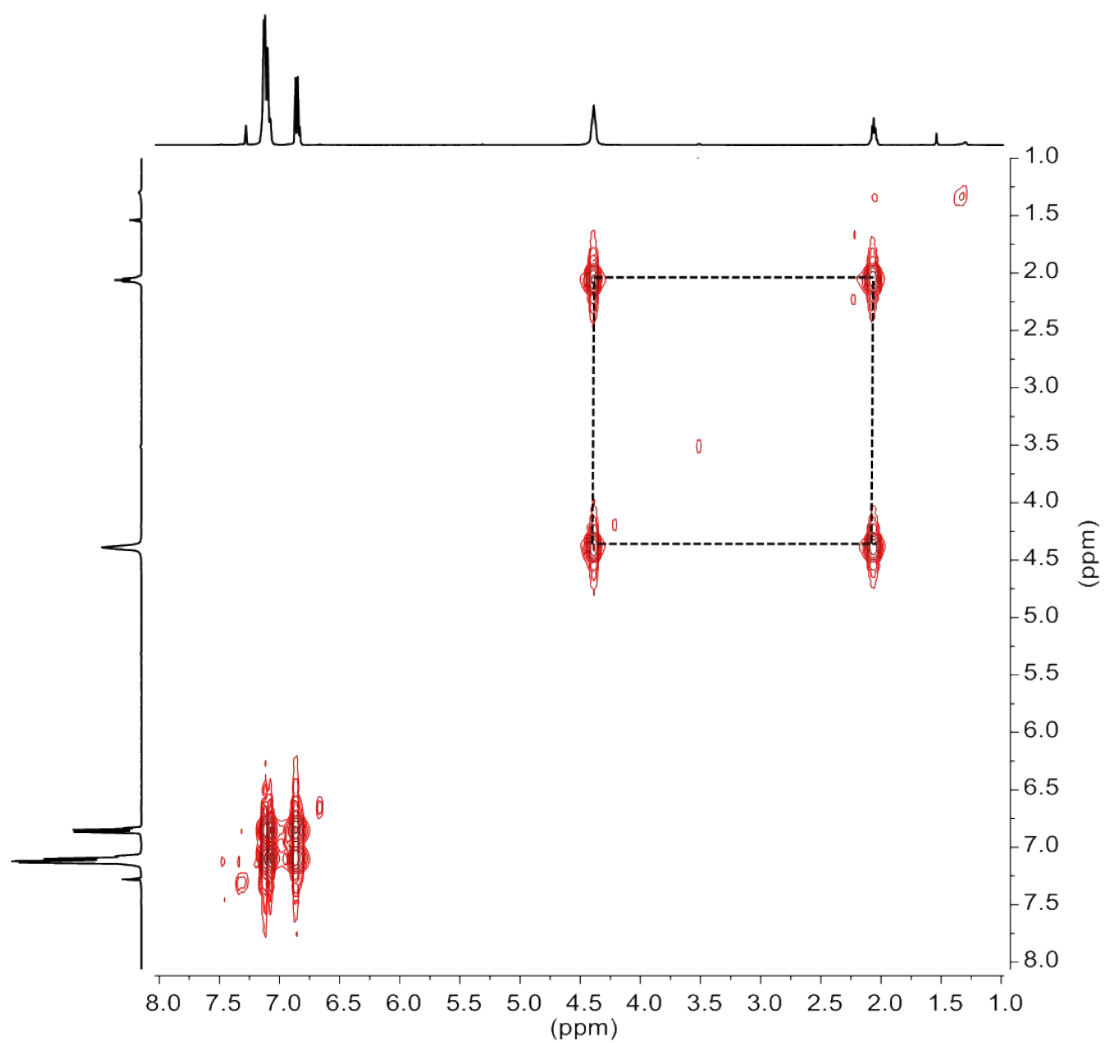

**Fig. S15.** 2D COSY spectrum of **TPEC3**.

data08 #148 RT: 2.54 AV: 1 NL: 2.35E5  
T: {0,0} + c ESI:corona sid=75.00 det=953.00 Full ms [100.00-1000.00]

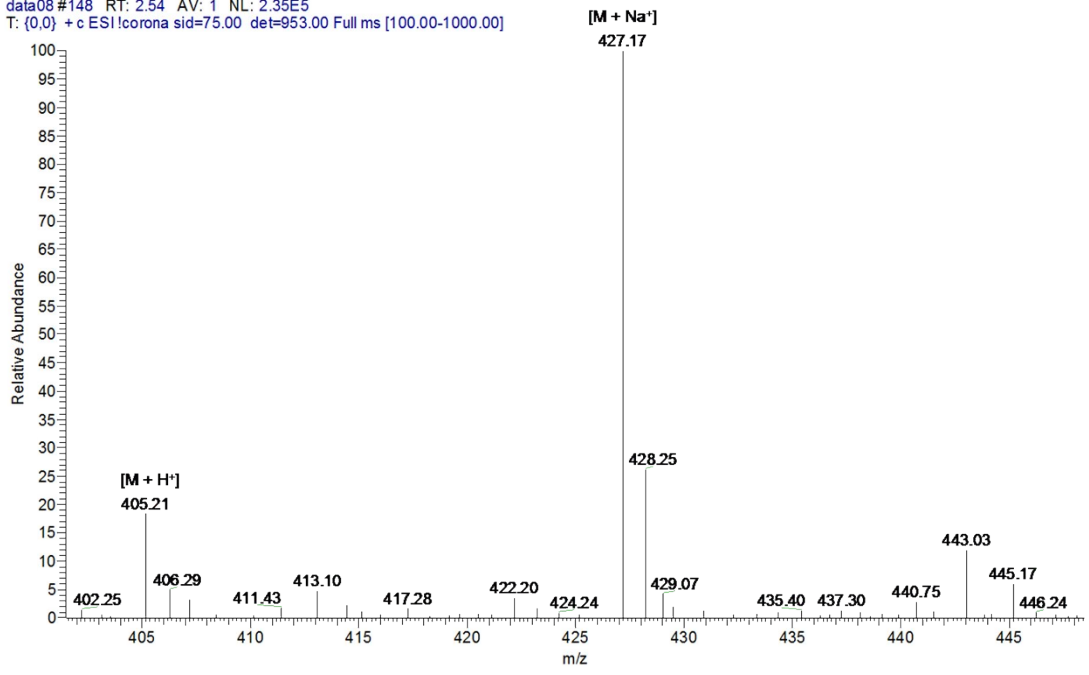

Fig. S16. ESI-MS spectrum of TPEC3.

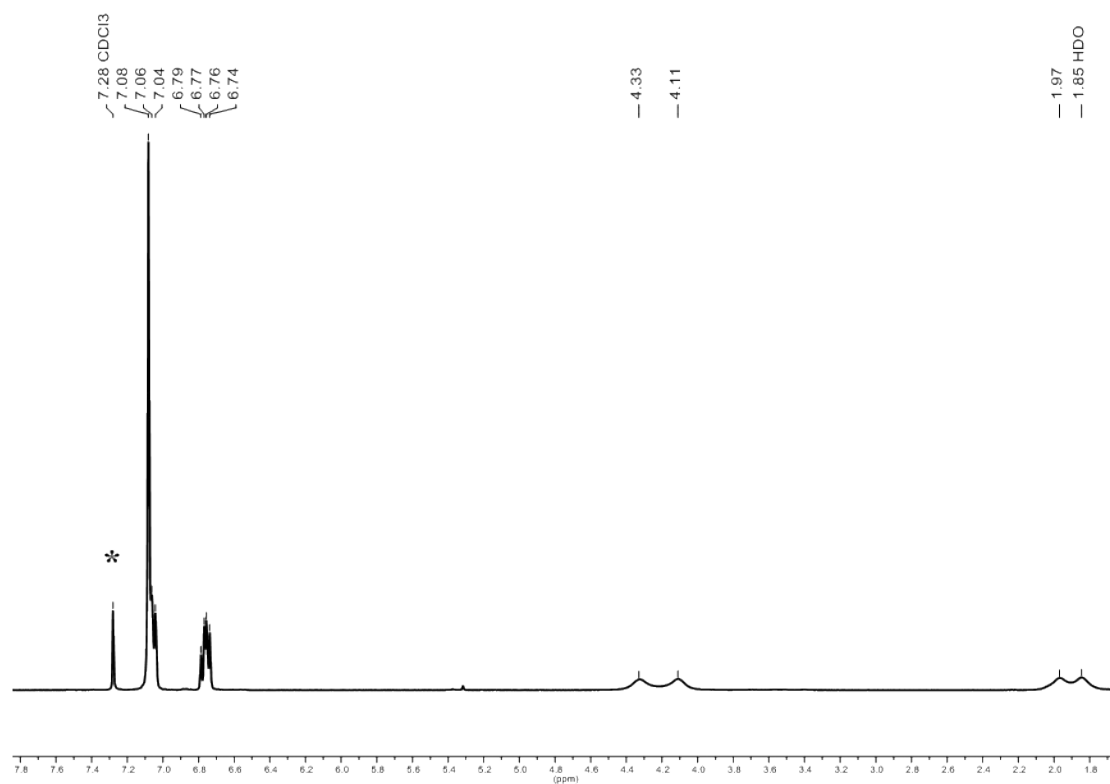

**Fig. S17.**  $^1\text{H}$  NMR spectrum of **TPEC4** in  $\text{CDCl}_3$ . The residual solvent signals are marked with asterisks.

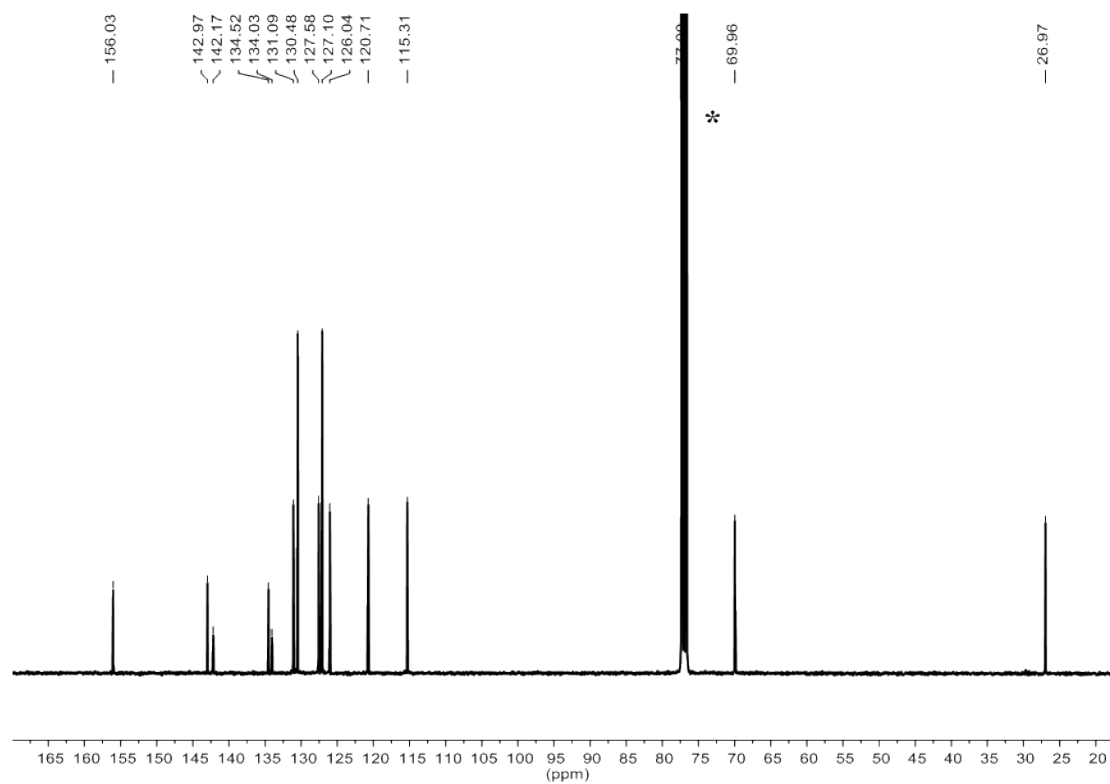

**Fig. S18.**  $^{13}\text{C}$  NMR spectrum of **TPEC4** in  $\text{CDCl}_3$ . The residual solvent signals are marked with asterisks.



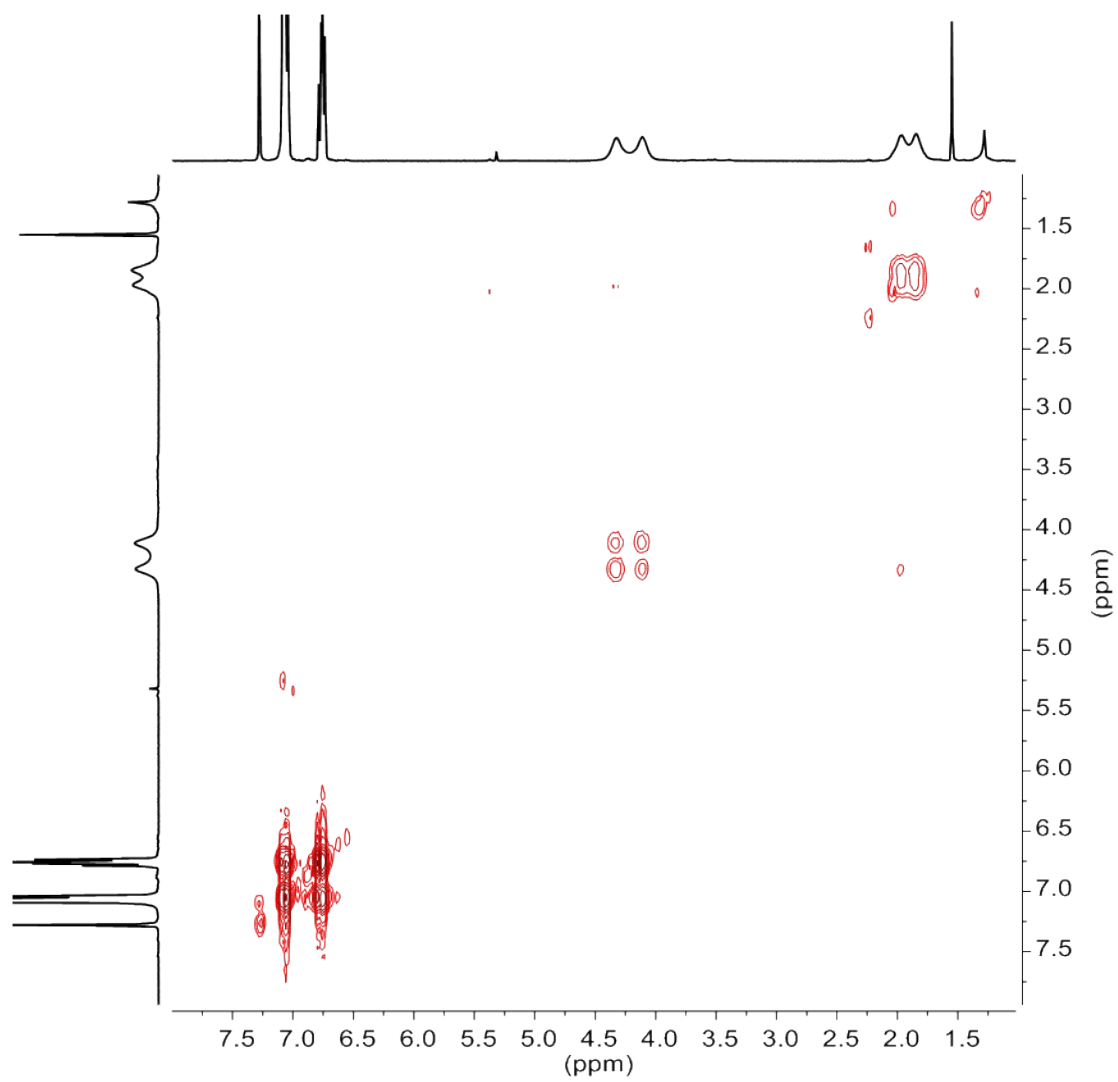

**Fig. S19.** 2D COSY spectrum of TPEC4.

data09 #170 RT: 2.92 AV: 1 NL: 9.28E4  
T: {0,0} + c ESI!corona sid=75.00 det=953.00 Full ms [100.00-1000.00]

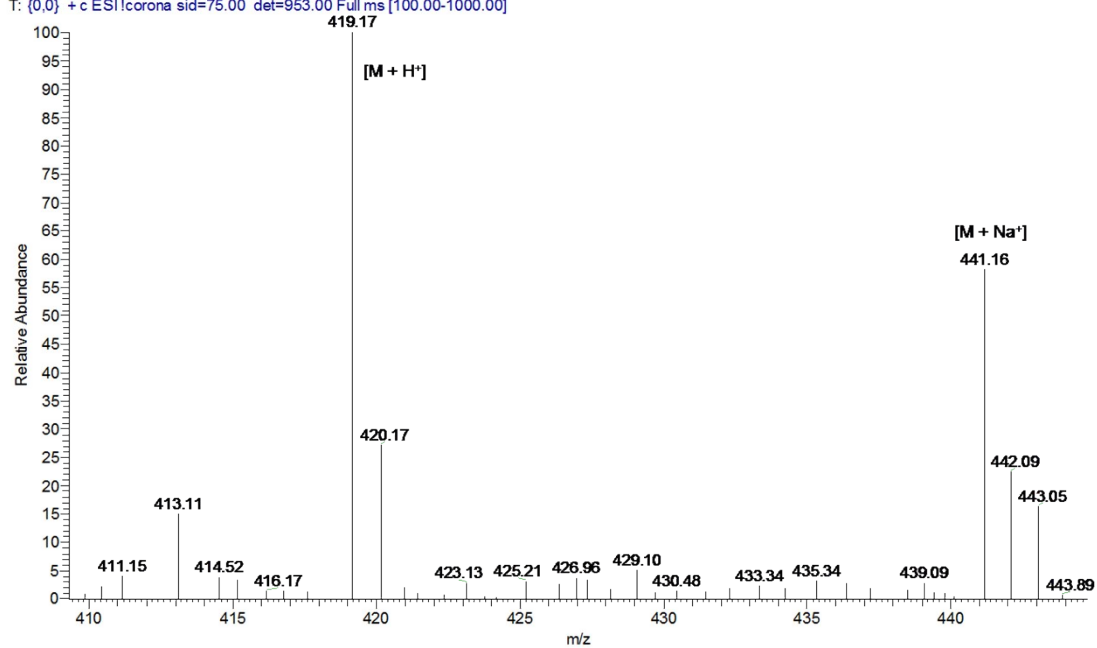

Fig. S20. ESI-MS spectrum of TPEC4.

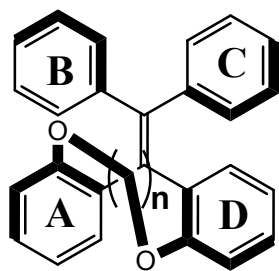

**M-TPE**

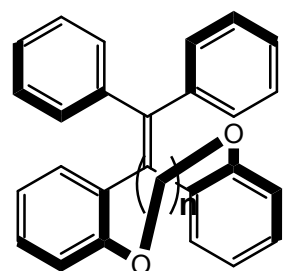

**P-TPE**

**Fig. S21.** The rule for nomination of the two conformational enantiomers of all compounds. The compounds possess propeller-shaped chirality (*P* and *M*) for achiral TPE twisting in one direction.

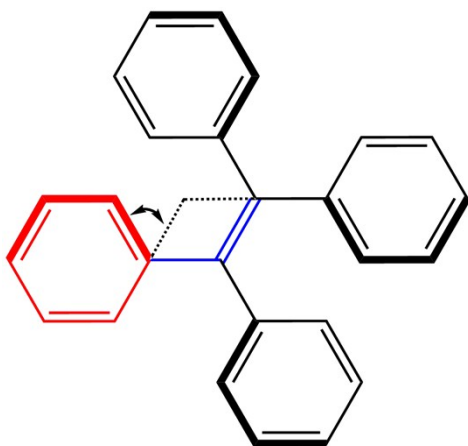

**Fig. S22.** The definition of the dihedral angles formed between the phenyl rings and the C = C bond.

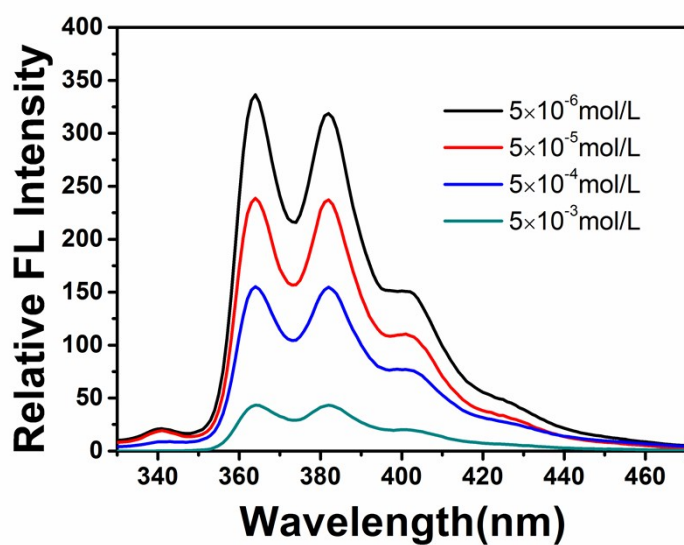

**Fig. S23.** Fluorescence spectra of **TPEC1** in different concentrations.  $\lambda_{\text{ex}}$ : 310 nm (5 nm, 5 nm); 293K. In high concentration, the short-wavelength emission band are selectively attenuated which attributed to the self-absorption.<sup>[1]</sup>

[1] J.R. Lakowicz, *Principles of Fluorescence Spectroscopy*. Springer US, 1999,57.

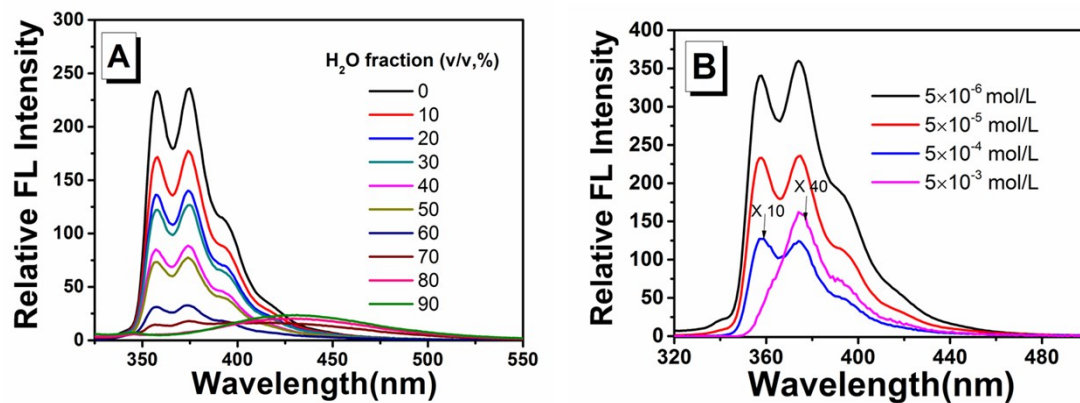

**Fig. S24.** Fluorescence spectra of triphenylethene in DMSO-water mixtures with different water fractions and in different concentrations.  $\lambda_{\text{ex}}$ : 310 nm (5 nm, 5 nm); 293K. In high concentration, the short-wavelength emission band are selectively attenuated which attributed to the self-absorption.<sup>[1]</sup>

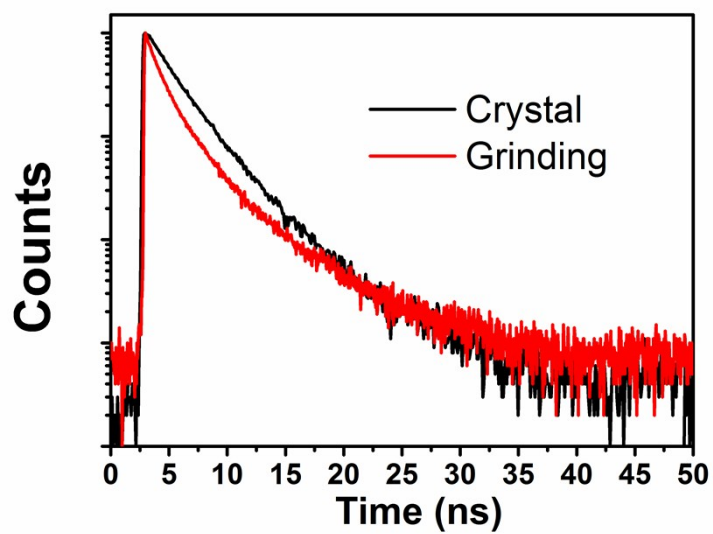

**Fig. S25.** The time-resolved emission decay curves ( $\lambda_{\text{ex}}$ : 375 nm) of **TPEC3** in crystal state and after grinding.

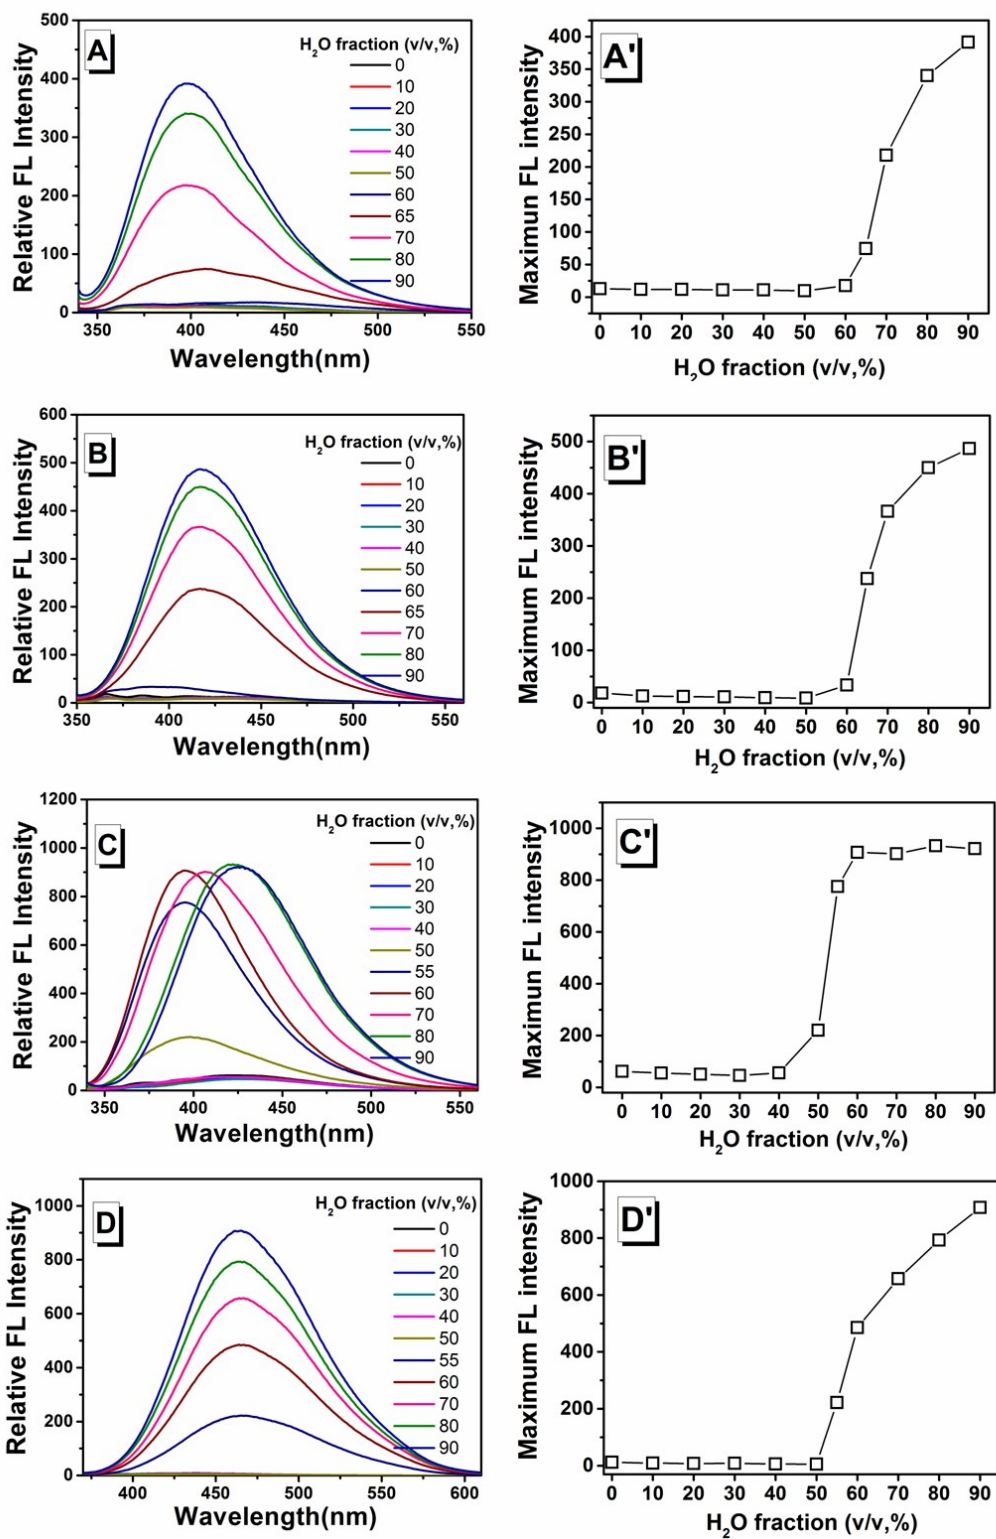

**Fig. S26.** Fluorescence spectra and plots of the fluorescence intensity at maximum emission of **TPEC2** (A, A'), **TPEC3** (B, B'), **TPEC4** (C, C'), and **TPEOMe** (D, D') in DMSO-water mixtures with different water fractions. Concentration: 50  $\mu$ M;  $\lambda_{ex}$ : 330 nm (5 nm, 5 nm); 293K.



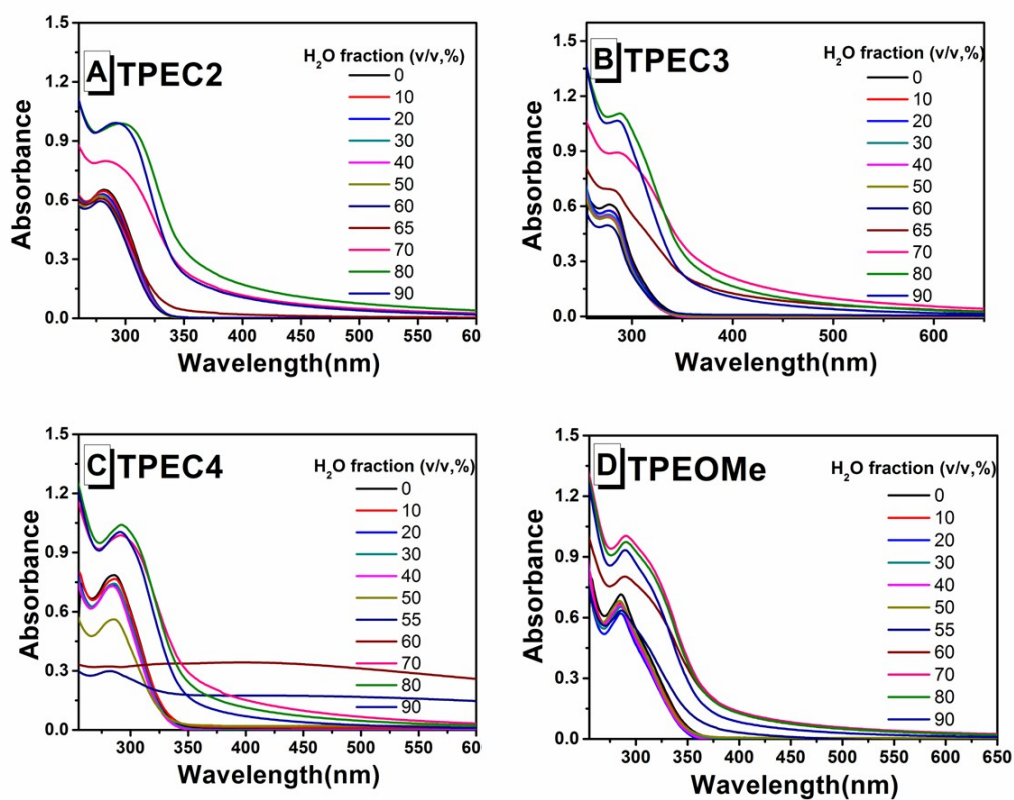

**Fig. S27.** (A) Uv-vis spectra of **TPEC2** (A), **TPEC3** (B), **TPEC4** (C), and **TPEOMe** (D) in DMSO-water mixtures with different water fractions. Concentration: 50  $\mu$ M. The absorbance spectra of **TPEC4** at  $f_w = 55, 60\%$  are not normal which may attribute to the particles formed in these situations make the scattering greater than the absorption.

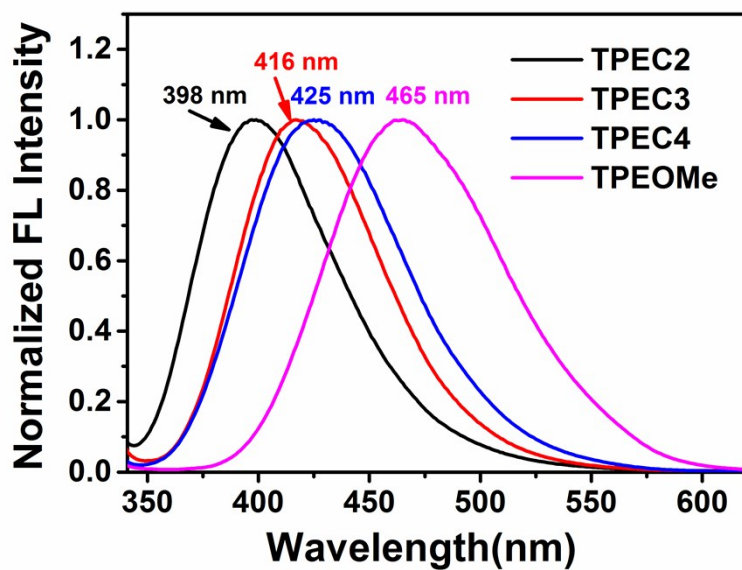

**Fig. S28.** (A) Normalized fluorescence spectra of **TPEC2**, **TPEC3**, **TPEC4**, and **TPEOMe** in DMSO-water mixtures with  $f_w = 90\%$ .  $\lambda_{ex}$ : 330 nm (5 nm, 5 nm); 293K.

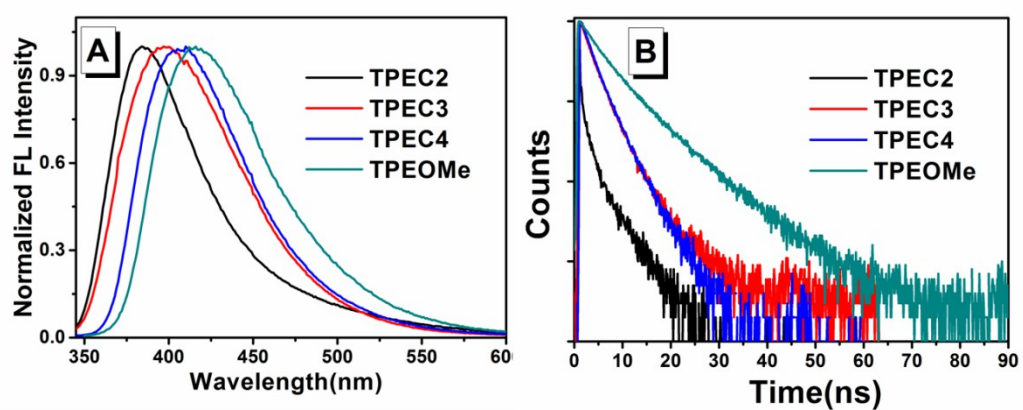

**Fig. S29.** (A) Fluorescence spectra ( $\lambda_{\text{ex}}$ : 330 nm) and (B) time-resolved emission decay curves ( $\lambda_{\text{ex}}$ : 375 nm) of **TPEC2**, **TPEC3**, **TPEC4**, and **TPEOMe** in crystal state.

**Table S1** Crystallographic data of **TPEOMe**, **TPEC1**, **TPEC2**, **TPEC3**, and **TPEC4**.

| Structure                           | TPEOMe                                         | TPEC1                                          | TPEC2                                          | TPEC3                                          | TPEC4                                          |
|-------------------------------------|------------------------------------------------|------------------------------------------------|------------------------------------------------|------------------------------------------------|------------------------------------------------|
| Temperature (K)                     | 293(2)                                         | 293(2)                                         | 293(2)                                         | 293(2)                                         | 296(2)                                         |
| chemical formula                    | C <sub>28</sub> H <sub>24</sub> O <sub>2</sub> | C <sub>27</sub> H <sub>20</sub> O <sub>2</sub> | C <sub>28</sub> H <sub>22</sub> O <sub>2</sub> | C <sub>29</sub> H <sub>24</sub> O <sub>2</sub> | C <sub>30</sub> H <sub>26</sub> O <sub>2</sub> |
| crystal system                      | monoclinic                                     | monoclinic                                     | monoclinic                                     | monoclinic                                     | monoclinic                                     |
| space group                         | <i>C2/c</i>                                    | <i>P21/n</i>                                   | <i>P21/n</i>                                   | <i>P21/c</i>                                   | <i>P21/c</i>                                   |
| formula weight                      | 392.50                                         | 376.43                                         | 390.48                                         | 404.51                                         | 418.54                                         |
| a(Å)                                | 14.5500(2)                                     | 9.2661(2)                                      | 9.1319(3)                                      | 14.1335(4)                                     | 9.3824(12)                                     |
| b(Å)                                | 12.0209(2)                                     | 8.4682(2)                                      | 19.4605(5)                                     | 9.1220(2)                                      | 9.3181(12)                                     |
| c(Å)                                | 25.0181(3)                                     | 25.0320(5)                                     | 12.3122(4)                                     | 17.8477(5)                                     | 25.644(3)                                      |
| α(°)                                | 90.00                                          | 90.00                                          | 90.00                                          | 90.00                                          | 90.00                                          |
| β(°)                                | 99.8280(10)                                    | 90.00                                          | 97.242(3)                                      | 109.798(3)                                     | 97.845(4)                                      |
| γ(°)                                | 90.00                                          | 90.00                                          | 90.00                                          | 90.00                                          | 90.00                                          |
| V(Å <sup>3</sup> )                  | 4311.55(11)                                    | 1946.56(7)                                     | 2170.56(11)                                    | 2165.02(10)                                    | 2221.0(5)                                      |
| D <sub>c</sub> (gcm <sup>-3</sup> ) | 1.408                                          | 1.284                                          | 1.195                                          | 1.424                                          | 1.252                                          |
| F(000)                              | 1890                                           | 792                                            | 824                                            | 960                                            | 888                                            |
| Z                                   | 126                                            | 4                                              | 8                                              | 64                                             | 4                                              |
| μ(mm <sup>-1</sup> )                | 1.153                                          | 0.626                                          | 0.579                                          | 1.166                                          | 0.077                                          |
| R1, [I > 2σ(I)]                     | 0.1135                                         | 0.0379                                         | 0.0568                                         | 0.0485                                         | 0.0731                                         |
| R1, (all data)                      | 0.1190                                         | 0.0402                                         | 0.0629                                         | 0.0560                                         | 0.1177                                         |
| ωR2, [I > 2σ(I)]                    | 0.2694                                         | 0.0959                                         | 0.2440                                         | 0.1249                                         | 0.1638                                         |
| ωR2, (all data)                     | 0.2734                                         | 0.0975                                         | 0.2326                                         | 0.1329                                         | 0.1806                                         |
| GOF                                 | 1.088                                          | 1.062                                          | 1.009                                          | 1.049                                          | 1.030                                          |

**Table S2.** The dihedral angles between the phenyl moieties and the C=C bond of **TPEC1**, **TPEC2**, **TPEC3**, **TPEC4**, and **TPEOMe** with *P* conformation.

| Compound      | A                   | B            | C                  | D                  |
|---------------|---------------------|--------------|--------------------|--------------------|
| <b>TPEC1</b>  | 47.102(89)°         | 54.667(79)°  | <b>89.276(84)°</b> | <b>82.696(66)°</b> |
| <b>TPEC2</b>  | 51.840(157)°        | 49.929(163)° | 64.350(137)°       | 70.759(152)°       |
| <b>TPEC3</b>  | <b>85.089(105)°</b> | 62.141(90)°  | 46.324(101)°       | <b>79.061(99)°</b> |
| <b>TPEC4</b>  | 65.745(246)°        | 34.278(204)° | 59.172(237)°       | 69.776(227)°       |
| <b>TPEOMe</b> | 68.978(72)°         | 38.071(106)° | 52.733(79)°        | 62.796(101)°       |

**Table S3.** The maximum emission wavelength, fluorescence quantum efficiency and fluorescence lifetime data of **TPEC1**, **TPEC2**, **TPEC3**, **TPEC4**, and **TPEOMe** in DMSO, DMSO-water mixtures with  $f_w = 90\%$ , crystal state and **TPEC3** after grinding.

| Compound              | In Solution             |                                      |                            | In Single Crystal State |          |              |                       |              |       |              |       |
|-----------------------|-------------------------|--------------------------------------|----------------------------|-------------------------|----------|--------------|-----------------------|--------------|-------|--------------|-------|
|                       | $\Phi_F$<br>( $f_w=0$ ) | $\lambda_{em}(nm)$<br>( $f_w=90\%$ ) | $\Phi_F$<br>( $f_w=90\%$ ) | $\lambda_{em}(nm)$      | $\Phi_F$ | $\tau_1(ns)$ | Fluorescence Lifetime |              |       |              |       |
|                       |                         |                                      |                            |                         |          |              | $A_1$                 | $\tau_2(ns)$ | $A_2$ | $\tau_3(ns)$ | $A_3$ |
| <b>TPEC1</b>          | 90.31                   | 380                                  | 28.76                      | -                       | 4.52     | 0.06         | 11%                   | 0.65         | 82%   | 5.43         | 6%    |
| <b>TPEC2</b>          | 49.22                   | 398                                  | 83.70                      | 384                     | 31.57    | 1.52         | 50%                   | 4.65         | 50%   |              |       |
| <b>TPEC3</b>          | 1.05                    | 417                                  | 86.74                      | 398                     | 38.91    | 2.34         | 84%                   | 5.10         | 16%   |              |       |
| <b>TPEC3 Grinding</b> | -                       | -                                    | -                          | 416                     | 65.14    | 0.78         | 36%                   | 2.45         | 51%   | 6.86         | 14%   |
| <b>TPEC4</b>          | 69.27                   | 425                                  | 109.04                     | 407                     | 63.31    | 0.93         | 38%                   | 2.40         | 62%   |              |       |
| <b>TPEOMe</b>         | 2.34                    | 465                                  | 83.31                      | 416                     | 67.76    | 1.14         | 20%                   | 2.97         | 59%   | 5.26         | 21%   |
